# Supplementary material for: A Porcine DNMT1 Variant: Molecular Cloning and Generation of Specific Polyclonal Antibody
Source: MDPI journal article supplement (doi:10.3390/genes14071324), 2023-06-23
Supplement: s1 [file s1]

Table S2: The GenBank accession number of predicted porcine DNMT1s.

| Name             | GenBank Accession Number<br>(mRNA) | GenBank Accession Number<br>(protein) |
|------------------|------------------------------------|---------------------------------------|
| Porcine DNMT1 X1 | XM_005654828.3                     | XP_005654885.1                        |
| Porcine DNMT1 X2 | XM_005654829.3                     | XP_005654886.1                        |
| Porcine DNMT1 X3 | XM_021082029.1                     | XP_020937688.1                        |
| Porcine DNMT1 X4 | XM_021082032.1                     | XP_020937691.1                        |
| Porcine DNMT1 X5 | XM_021082036.1                     | XP_020937695.1                        |
| Porcine DNMT1 X6 | XM_021082040.1                     | XP_020937699.1                        |
| Porcine DNMT1 X7 | XM_021082053.1                     | XP_020937712.1                        |
| Porcine DNMT1 X8 | XM_021082064.1                     | XP_020937723.1                        |
